# Supplementary material
Source: MDPI journal article supplement (https://www.mdpi.com/1424-2818/15/3/365)
Supplement: s1 [file s1]

## Supplementary Materials

### The European ground squirrel's genetic diversity in its ancestral land: landscape insights and conservation implications

Yordan Koshev, Štěpánka Říčanová, Maria Kachamakova, Oldřich Říčan

**Table S1.** Genetic diversity in ten populations of the European ground squirrel based on 12 microsatellite loci.

| Locality                 | N  | AR   | NA   | <i>He</i> | <i>Ho</i> | <i>F<sub>IS</sub></i> | Wilcoxon test |
|--------------------------|----|------|------|-----------|-----------|-----------------------|---------------|
| NP (Nikopol)             | 19 | 3.77 | 4.92 | 0.634     | 0.574     | 0.121                 | <b>0.007</b>  |
| TS (Tsenovo)             | 18 | 3.62 | 5.50 | 0.555     | 0.557     | 0.027                 | 0.365         |
| BN (Belmeken)            | 20 | 3.34 | 4.92 | 0.564     | 0.484     | 0.167*                | 0.380         |
| KZ (Knezha)              | 17 | 3.65 | 4.83 | 0.626     | 0.593     | 0.083                 | 0.147         |
| KAP (Kap. Petko Voivoda) | 21 | 4.58 | 7.25 | 0.748     | 0.627     | 0.185*                | 0.622         |
| TOP (Topolchane)         | 17 | 5.30 | 8.67 | 0.783     | 0.634     | 0.220*                | 0.301         |
| RZ (Rozino)              | 22 | 3.69 | 5.83 | 0.588     | 0.505     | 0.166*                | 0.301         |
| KRE (Kremikovtsi)        | 25 | 5.04 | 9.08 | 0.717     | 0.487     | 0.340*                | 0.176         |
| CG (Chernogorovo)        | 8  | 4.81 | 5.83 | 0.669     | 0.594     | 0.177*                | 0.970         |
| ISH (Proff. Ishirkovo)   | 6  | 4.15 | 4.42 | 0.602     | 0.667     | -0.016                | 0.380         |

Sample size (N), allelic richness (AR), mean number of alleles per locus (NA), expected heterozygosity (*He*), observed heterozygosity (*Ho*), coefficient of inbreeding (*F<sub>IS</sub>*) in the studied populations, *Wilcoxon test* - test detecting recent bottleneck in populations. Note: \* value is significant at  $p < 0.05$ .

**Table S2.**  $F_{ST}$  values using ENA (from FreeNA. Chapuis & Estoup 2007) between EGS populations based on msats data.

|     | NP  | TS    | BN    | KZ    | KAP   | TOP   | RZ    | KRE   | CG    | ISH   |
|-----|-----|-------|-------|-------|-------|-------|-------|-------|-------|-------|
| NP  | -   | 0.094 | 0.199 | 0.119 | 0.198 | 0.173 | 0.240 | 0.148 | 0.175 | 0.121 |
| TS  | *** | -     | 0.289 | 0.156 | 0.247 | 0.233 | 0.287 | 0.212 | 0.208 | 0.191 |
| BN  | *** | ***   | -     | 0.212 | 0.245 | 0.209 | 0.286 | 0.167 | 0.251 | 0.232 |
| KZ  | *** | ***   | ***   | -     | 0.214 | 0.161 | 0.222 | 0.134 | 0.139 | 0.160 |
| KAP | *** | ***   | ***   | ***   | -     | 0.113 | 0.187 | 0.149 | 0.161 | 0.194 |
| TOP | *** | ***   | ***   | ***   | ***   | -     | 0.193 | 0.135 | 0.131 | 0.177 |
| RZ  | *** | ***   | ***   | ***   | ***   | ***   | -     | 0.205 | 0.170 | 0.244 |
| KRE | *** | ***   | ***   | ***   | ***   | ***   | ***   | -     | 0.124 | 0.162 |
| CG  | *** | ***   | ***   | ***   | ***   | ***   | ***   | ***   | -     | 0.169 |
| ISH | *** | ***   | ***   | ***   | ***   | ***   | ***   | ***   | ***   | -     |

Pairwise values are above diagonal. Values of significance are below diagonal; \*\*\* value is significant at the level  $P < 0.001$ .

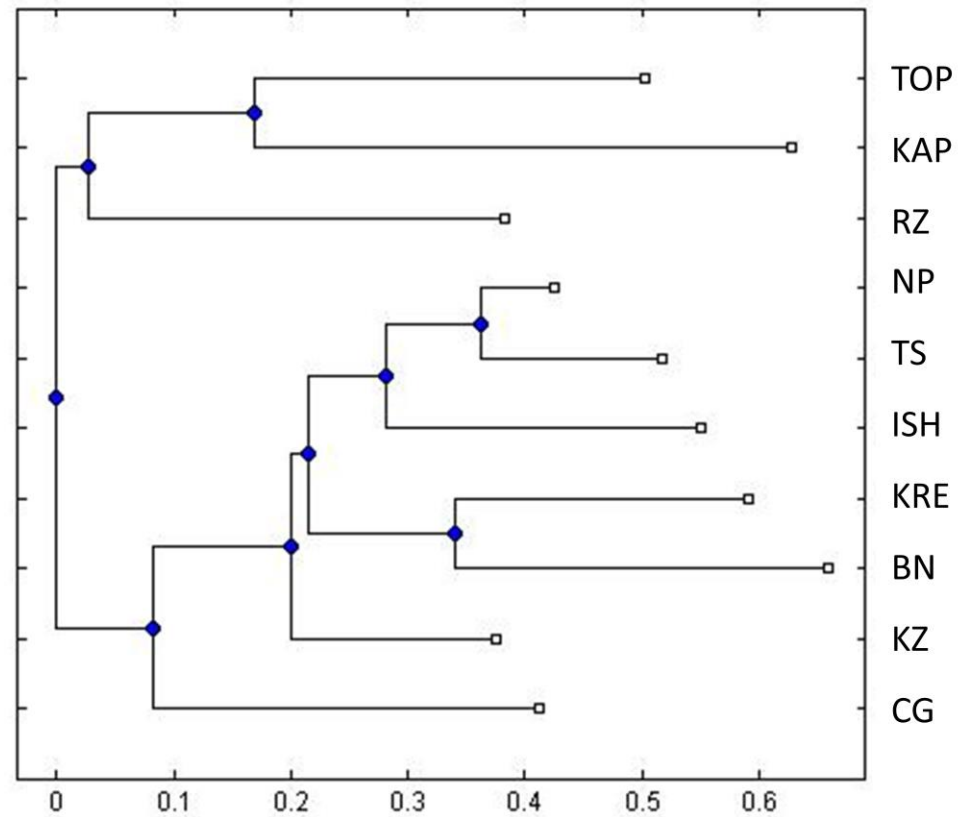

**Figure S1.** Neighbor- joining tree from BAPS based on Nei genetic distances divides studied populations into two clusters. i. e. Bulgarian northern and southern group of populations
